# Supplementary material
Source: PubMed Central journal article supplement (PMC4424039)
Supplement: NIHMS62536-supplement-2.pdf [file NIHMS62536-supplement-2.pdf]

Supplementary Table

| Name           | Sequence of forward primer  | Sequence of reverse primer | Amplified region    |
|----------------|-----------------------------|----------------------------|---------------------|
| GAPDH +119     | AGGTGAAGACGGGCGGAGAGA       | GCGAACACATCCGGCCT          | +78/+160 (TSS)      |
| GAPDH +925     | CTCGATGGGTGGAGTCGC          | CTAGGAAAAGCATCACCCGGA      | +881/+968 (TSS)     |
| GAPDH +1675    | GGTGGTGAAGCAGGCGTCGGAGGGC   | GAGCCAGTCTCTGGCCCCAGCCACA  | +3348/+3534 (TSS)   |
| 7SK            | CTGATCTGGCTGGCTAGGCGGG      | GAAGACCGGTCTCTCTATCGG      | +11/+181 (TSS)      |
| 5'ETS rRNA     | TGAGTGAGACGAGACGAGAC        | GAAGTCAACCCACACACGA        | +961/+1168 (TSS)    |
| Leu74 tRNA     | AGC TTG GCT TCC TCG TGT T   | TGTCAGAAGTGGGATTCGAAC      | +37/+105 (TSS)      |
| TRPM7 -927     | GATGGAGAGGGACGAGATGAAGG     | GACATACCTGTGCACCCATG       | -979/-876 (TSS)     |
| TRPM7 +172     | CTAGCGCCGGAGCTGAGTTAG       | TTCCCGATAGATGGCTACAGG      | +120/+225 (TSS)     |
| TRPM7 +394     | CGGTAAAGGAGAGACTTGCCA       | GGGACGGGTGTGCAGTTCTTCT     | +334/+455 (TSS)     |
| TRPM7 +653     | GGGACGGGTGTGCAGTTCTTCT      | CAGTTGCTGGCAGATAAGGGAA     | +614/+692 (TSS)     |
| TRPM7 +898     | GGAACCAAAGGGAGGGATT         | CTGTCAGTCAGGATTTAAGTCGAAC  | +830/+966 (TSS)     |
| DHX9 +660      | GATAACCTCGCCAACGCGAAG       | CATGTGACTGGAGTGTGGCGA      | +600/+720 (TSS)     |
| DHX9 +949      | GGTGAAGGTAGTAGATCTGGA       | GGCTCACAGCAACGTCCGGTC      | +878/+1020 (TSS)    |
| DHX9 +1499     | GAAATGTAGGGGTAGGGTGTGG      | GGGTGAGTTAGTGCCACAGTTGGATG | +1388/+1611 (TSS)   |
| DHX9 +2125     | CATTCACCATGAGGGCTTGTGTTTAAT | TTCCCTTCGCCAAATGGATGACCA   | +2066/+2184 (TSS)   |
| PLK2 -1386     | AAGTGCTCCTCTGTACCAGGA       | GGAATCATGACCAGGAAATGTACGG  | -1440/-1332 (TSS)   |
| PLK2 +253      | ACCGGGGTGTTGGGTGCTAGT       | ATAGTCCGCAAAGCTCCATG       | +185/+321 (TSS)     |
| PLK2 +624      | AGTGCTGGAAAGGTGACAAGCGG     | ATCGGACCCCCGAAAACCCGGAA    | +559/+689 (TSS)     |
| PLK2 +988      | GTTCCAACCTCCCTCATAAAGCTC    | TTGAGGAATGGAGGAGGTGGACA    | +916/+1061 (TSS)    |
| EIF2S3 +420    | AACCAGCGAACTTCAGACGCT       | GTCCCCAGCTTGTCCAGAGA       | -480/-360 (TSS)     |
| EIF2S3 +335    | GAGAAGCTGGAGTGACTCTAGG      | CACTGACTAGTCCCAATACC       | +264/+406 (TSS)     |
| EIF2S3 +662    | GGTGTCTGTCTGCATTACTT        | CACAACAGACTACACCTCCAC      | +610/+714 (TSS)     |
| EIF2S3 +862    | GATGGTGGCAAGATGTAGATAGCA    | CGTCAACTTGGTAACATCCTGCAATG | +808/+917 (TSS)     |
| EIF2S3 +1635   | TACAGGCCTTGAACACTGCT        | CTTAGCATAGTTGTTCCGGAGG     | +1591/+1679 (TSS)   |
| KPNB1 TSS+0.9  | AGGGAAGGGAAGTTAGTTGCG       | GAGCTTCCACATGGCCCTA        | +900/+986 (TSS)     |
| KPNB1 TSS+5.3  | GCAAAGCAGGATACTAAGTGATCCGA  | GAAGCCACAATTGACCTAGAGC     | +5234/+5405 (TSS)   |
| KPNB1 TSS+20.2 | TGCAAGAGCCAGTGGGAACACTT     | CCTCTACTCAGCAATGATACTTC    | +20187/+20370 (TSS) |
| KPNB1 pA-4.8   | CTGAGGAAACTGAAGAACCAAG      | GAAGGCAGTGCTTGCCAGAAT      | -4862/-4746 (end)   |
| KPNB1 pA-2.9   | GAGGAGTGTGCACGGATGCTGAA     | CCAAGATGGCCGATGTTATGG      | -3030/-2855 (end)   |
| KPNB1 pA-0.4   | TAGTTACCGTCTGCTTGGGAAGATG   | CCTCTGACAGCAAGTCCAACATT    | -510/-330 (end)     |
| KPNB1 pA+1.4   | GACTCATCACACCAAGGTCAC       | GATAGTGCTGGGAAGGAAATGG     | +1320/+1490 (end)   |
| KPNB1 pA+2.6   | GTACATCTCAGCTTTGGCATATG     | GCCCAGAACATAGCAGGCATTGC    | +2587/+2728 (end)   |
| KPNB1 pA+4.1   | GTTTCACCGTGTAGCCAGGATGG     | CCACAGCCATGTTTATTCTGC      | +4053/+4217 (end)   |
| KPNB1 pA       | CAGTCTGTGATGGCATTTAAG       | TCTGACTTTCAAACATTTACCTCC   | -114/+77 (end)      |
| DHX9 +1118     | CCTGCCTCAAGATGATCTCC        | GCTAGCTACAGCTGTACAGC       | +1028/+1208 (end)   |
| DHX9 +1654     | GAAAGTGCTTCCACATAGCCATGG    | CTGGATTCCCCTTACAGCTATGAC   | +1568/+1740 (end)   |
| DHX9 -122      | GGC ATG CTA TGT GTT ACG TG  | CGAGGTCAACAAACAACTACAGGC   | -272/+29 (end)      |

Supplementary Table . Sequences of primers used and their position relative to the TSS or the end of gene (end).
