# Supplementary material
Source: PubMed Central journal article supplement (PMC4424039)

# Supplementary Data Set

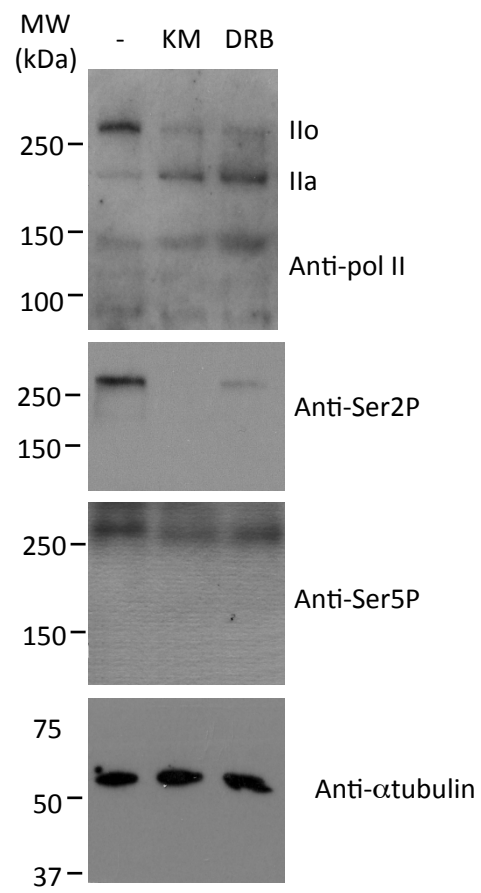

Figure 1c

Supplement: NIHMS62536-supplement-3.pdf [file NIHMS62536-supplement-3.pdf]
